# Supplementary material for: Neurological Response to cART vs. cART plus Integrase Inhibitor and CCR5 Antagonist Initiated during Acute HIV
Source: PLoS One. 2015 Nov 10;10(11):e0142600. doi: 10.1371/journal.pone.0142600 (PMC4640512; doi:10.1371/journal.pone.0142600)
Supplement: S1 Dataset — (XLSX) [file pone.0142600.s002.xlsx]

## Sheet: Sheet1
Week	Arm	ArmC	HIV	Age	Gender	Educ	CD4	pVL	logpVL	cVL	logcVL	zCT1	zCT2	zGPND	zTrailsA	NPZ4	cNeopt	CIP10	cIL6	cMCP1	pNeopt	pIP10	pIL6	pMCP1	FGMCr	FGMCho	FGMNAA	FGMMI	FGMGlx	FWMCr	FWMCho	FWMNAA	FWMMI	FMWGlx	BGCr	BGCho	BGNAA	BGMI	BGGlx	PGMCr	PGMCho	PGMNAA	PGMMI	PGMGlx
0	Control Arm	0	0	39	2	14						0.27966	0.301233	0.0971656	0.272479	0.237634	527.62	91.8333	4.3	386.267	785.603	38.5667	4.3	198.167	10.483	2.874	11.325	8.526	19.653	9.037	3.178	12.063	7.951	12.684	9.056	2.291	8.315	5.683	17.338	10.639	1.582	14.165	7.964	17.109
0	Control Arm	0	0	32	1	11						0.733182	-0.255089	-1.39728	-0.346178	-0.316342	375.707	153.067	4.3	322.6	710.99	27.1667	4.3	127.933	7.226	2.033	9.253	7.119	15.159	7.862	2.792	10.715	8.145	14.755	9.648	1.883	8.933	4.854	16.092	9.817	1.734	16.285	8.178	18.054
0	Control Arm	0	0	24	1	11						0.474048	0.148217	-0.655913	0.154927	0.0303197	812.156	215.6	4.3	301.633	909.718	25.3	4.3	32.5667	6.746	2.049	9.462	6.908	18.483	7.656	2.9	13.061	8.742	13.748	9.667	2.018	10.086	5.481	19.585	10.189	1.51	15.311	8.291	18.678
0	Control Arm	0	0	39	2	6						1.5671	0.317811	1.57051	1.03538	1.1227	722.117	234.633	4.3	425.433	610.876	32.3667	4.3	108.2	6.227	1.654	8.083	5.476	15.441	6.106	2.902	9.098	6.318	13.629	11.304	2.85	11.124	7.412	24.9	9.829	1.435	15.466	8.197	21.447
0	Control Arm	0	0	24	2	4						0.408504	0.0974047	0.78473	0.297682	0.39708	1973.03	1283.13	4.3	398.633	743.318	29.4	4.3	148	6.784	1.802	8.083	7.156	16.114	8.781	2.653	11.162	10.514	14.712	10.748	2.299	8.597	7.378	19.738	10.612	1.561	15.038	9.892	22.144
0	Control Arm	0	0	33	2	14						-0.537625	0.731469	-0.833273	-0.352911	-0.248085	412.245	188.1	4.3	330.067	177.1	31.9667	4.3	110.733	7.627	1.78	8.721	6.872	15.28	10.426	3.259	13.803	10.578	18.133	11.032	2.235	11.314	5.679	19.137	12.581	1.782	17.052	10.146	14.661
0	Control Arm	0	0	42	2												956.163	890.533	4.3	422.833	525.355	31.8333	4.3	103.767	7.142	1.81	8.695	6.698	16.879	9.355	2.47	11.938	10.926	17.337	9.941	2.11	7.862	6.872	19.99	10.949	1.971	14.4	9.052	19.143
0	Control Arm	0	0	33	1												709.731	78.4667	4.3	230.367	792.934	18.7	4.3	76.7333	8.857	2.615	9.6	7.832	20.527	7.96	2.997	11.213	6.463	13.463						10.015	1.458	16.723	8.596	17.806
0	Control Arm	0	0	34	1	16						-0.120778	-0.709688	0.281619	-0.0970837	-0.161483	618.863	78.4	4.3	213.1	610.876	47.2667	4.3	45.1667	7.944	1.962	10.053	7.253	15.454	9.133	2.65	12.378	8.101	14.518	9.902	2.401	9.55	5.301	20.351	10.484	1.454	14.951	7.849	14.889
0	Control Arm	0	0	37	2												492.995	123.867	4.3	377.567	578.728	18.0667	4.3	92	7.749	2.02	8.843	5.493	15.489	8.572	2.756	12.863	7.989	15.613	8.508	1.861	7.899	5.083	22.174	11.556	1.77	16.781	9.435	20.218
0	Control Arm	0	0	30	2	6						2.317	1.23133	-0.000671513	0.0668398	0.903624	782.818	1201.7	4.3	941.433	758.616	27	4.3	98.6	7.734	2.05	9.621	6.579	19.406	8.138	3.324	10.413	5.515	12.438	8.814	1.692	7.13	4.041	19.512	10.383	1.664	15.083	6.553	16.614
0	Control Arm	0	0	35	1	9						1.33455	0.0819373	-0.119091	1.68516	0.74564	713.603	109.833	4.3	190.567	306.437	23	4.3	65	9.268	2.259	10.039	8.217	16.708	9.613	3.144	11.464	7.591	13.852	9.538	2.297	8.853	4.583	20.453	10.409	1.54	16.746	7.799	19.607
0	Control Arm	0	0	22	2												727.311	185.367	4.3	237.933	622.258	14.7333	4.3	71.2	8.996	2.322	8.767	7.537	16.047	10.072	2.384	11.359	10.201	14.556	10.695	2.362	8.113	6.715	17.145	10.442	1.227	14.296	4.94	18.361
0	Control Arm	0	0	45	1	6						1.26458	1.04317	0.627252	1.40757	1.08564	683.171	269.133	4.3	565.633	757.302	19.5667	4.3	70.6	8.054	2.173	8.91	7.08	19.325	7.457	3.742	11.318	7.454	13.376	9.684	2.226	8.484	5.447	19.383	10.748	1.669	14.802	8.465	15.897
0	Control Arm	0	0	27	1	11						0.307064	0.903732	1.58485	1.6701	1.11644	501.206	79.0667	4.3	245.433	757.115	33	4.3	78.8667	6.917	2.047	9.548	6.146	17.808	8.144	3.002	12.111	8.218	14.383	10.505	1.845	10.771	6.196	16.577	10.744	1.586	17.285	7.199	17.691
0	Control Arm	0	0	41	1	18						1.00439	-0.238079	-1.80806	0.869003	-0.0431866	162.575	162.933	4.3	333.133	564.511	48.9333	4.3	77.5333	9.572	2.677	11.594	7.186	16.328	8.519	3.115	11.365	7.001	13.707	10.163	2.488	8.791	5.481	21.841	11.007	1.66	15.274	7.75	19.768
0	Control Arm	0	0	39	2
0	Control Arm	0	0	40	1	18						-0.801552	-0.359008	-1.88502	-0.667008	-0.928146	379.256	56.8	4.3	195.667	443.127	27.2667	4.3	79.1	9.344	2.359	9.78	6.43	13.106	9.016	2.887	11.864	9.442	12.623	9.613	2.075	9.793	5.32	17.821	12.325	1.317	15.572	9.039	13.387
0	Control Arm	0	0	25	2	14						0.484873	0.262484	-0.0702804	0.238331	0.228852	518.213	366.1	4.3	392.933	872.711	46.8667	4.3	93.5333	6.616	1.993	8.626	6.242	16.136	8.08	3.43	12.606	7.365	15.612	7.487	2.151	8.924	6.204	16.995	10.496	1.632	14.537	7	18.927
0	Control Arm	0	0	35	2	19						0.703701	0.756082	-1.1366	0.0120507	0.083809									8.153	2.314	10.144	6.727	18.146	9.178	2.892	11.887	9.134	13.977	11.726	2.58	10.983	6.214	18.795	8.906	1.545	12.749	6.935	17.124
0	Control Arm	0	0	35	1	6						-0.207838	0.0878749	0.368479	-0.627142	-0.0946564									7.685	2.137	10.294	7.028	16.147	7.139	2.709	11.183	7.87	15.987	10.271	2.184	9.666	7.23	20.073	8.592	1.467	12.551	7.419	16.436
0	Control Arm	0	0	34	1	14						-0.565228	-1.67743	0.121786	-2.02117	-1.03551									7.248	1.692	10.641	6.642	16.891	8.175	3.119	12.496	7.934	15.555	10.218	2.33	13.415	6.582	18.528	9.429	1.358	14.226	6.823	17.359
0	Control Arm	0	0	28	1	18						0.388427	0.441621	-1.30163	-0.757818	-0.307349									8.749	2.521	12.683	8.539	20.666	8.755	2.498	11.845	7.745	14.305	7.596	1.891	9.53	4.193	16.195	10.323	1.89	13.93	8.288	21.437
0	Control Arm	0	0	38	2	16						1.28827	-0.186671	-0.123586	0.167957	0.286491									8.109	2.242	9.412	7.896	20.498	9.138	3.262	11.177	7.616	14.803	9.101	2.165	10.211	6.222	18.451	12.215	1.693	17.254	8.386	21.438
0	Control Arm	0	0	42	1	21						1.39638	1.13423	0.430719	-1.22392	0.434351									6.625	1.759	8.036	5.841	14.818	8.36	2.696	10.577	7.879	11.008	9.33	1.927	8.901	4.468	13.862	11.048	1.564	14.326	8.438	18.694
0	Control Arm	0	0	35	2	12						-0.625234	-0.229373	-0.462944	-0.701083	-0.504658									6.345	1.929	8.482	6.597	13.744	6.472	2.518	10.063	7.21	10.311	9.389	2.198	10.391	5.595	14.483	10.167	1.714	14.287	8.444	22.648
0	Control Arm	0	0	29	2	14						0.627949	-0.393459	1.09937	1.65036	0.746055									7.172	1.694	8.757	7.427	15.926	9.085	2.857	13.021	8.158	14.139	10.117	2.166	10.688	6.072	20.006	9.088	1.099	15.414	5.638	12.507
0	Control Arm	0	0	46	2	16						0.534645	0.175066	-0.137954	0.963849	0.383902									7.687	2.38	10.432	6.965	16.614	8.353	2.906	11.183	9.139	10.469	8.36	1.875	9.337	5.639	14.82	8.983	1.369	12.692	7.662	15.944
0	Control Arm	0	0	39	2	25						0.289635	0.0295018	-1.63554	-0.906064	-0.555618									7.034	2.075	8.498	5.507	16.164	8.33	3.014	10.83	8.037	10.344	10.504	2.538	10.161	4.481	19.027	10.318	1.402	13.453	6.072	18.845
0	cART Arm	1	1	23	2	16	257	71472	4.85414												2467	963.329	15.03	180.033	6.314	1.978	7.487	4.206	16.625	7.913	3.098	12.931	6.014	11.479	9.935	2.623	10.71	4.373	19.331	11.846	2.343	16.193	7.597	24.126
0	cART Arm	1	1	34	2	6	386	358198	5.55412	2351	3.37125	0.0266032	0.44053	-1.59722	0.211808	-0.229568	1715.1	289.563	5.10667	391.577	3269.9	660.135	4.3	61.811	7.617	2.171	8.545	6.082	18.042	8.021	3.248	11.02	8.301	14.507	7.532	1.914	8.072	3.919	22.796	9.966	1.884	12.452	7.804	17.337
0	cART Arm	1	1	32	2	14	621	30811000	7.48871	14710	4.16761	-0.0803775	-0.242442	-0.448582	-0.115296	-0.221674	2553.28	765.515	4.32333	1177.6	2308.7	466.864	4.3	191.61	6.569	1.815	9.289	6.66	16.542	8.128	2.816	12.341	9.532	13.645	8.877	2.305	11.585	6.021	15.683	9.216	1.586	12.7	8.705	14.741
0	cART Arm	1	1	32	2	19	1127	5465	3.73759			1.46607	0.732063	0.231724	0.807173	0.809258					1403.9	200.652	4.3	124.677	6.753	2.15	8.25	6.064	16.089	7.691	2.953	11.302	9.227	10.642	11.162	3.022	12.403	8.517	20.563	9.838	1.681	15.295	7.937	20.213
0	cART Arm	1	1	29	1	20	454	25398	4.4048			-1.1306	0.36848	0.296623	-1.16907	-0.408642					1710.99	347.827	4.3	189.237	7.401	1.846	10.181	6.144	15.729	8.688	2.936	10.778	11.014	15.512	9.865	2.331	9.852	6.025	19.114	9.172	1.69	12.39	7.758	17.775
0	cART Arm	1	1	23	2	15	555	170732	5.23231	1	0	1.2533	-0.761366	0.318523	0.807253	0.404429	1092.96	499.992	9.06333	1188	1116.6	412.465	4.3	245.248	8.126	2.561	10.747	7.656	22.654	6.985	2.426	10.977	7.965	14.624	10.907	2.559	10.93	5.488	21.588	10.046	1.492	12.887	7.713	19.784
0	cART Arm	1	1	31	2	18	352	4939160	6.69365			-0.420367	-0.951081	0.977119	-1.41709	-0.452855					3077.7	486.786	4.3	108.894	7.453	1.989	9.685	5.919	17.77	8.358	3.182	12.226	7.349	13.1	9.461	2.61	11.782	5.521	17.311	10.067	2.01	14.485	6.368	19.213
0	cART Arm	1	1	25	2	16	231	1329100	6.12356	160255	5.20481	0.514262	-1.94845	0.518506	-0.250041	-0.291431	3401.08	787.539	4.3	630.05	2307.3	494.237	4.3	130.854	7.496	2.193	8.813	5.319	16.88	8.678	3.032	13.497	7.062	14.654	10.117	2.475	11.787	4.813	20.167	10.267	1.805	14.321	5.842	19.216
0	cART Arm	1	1	31	1	18	970	1852	3.26764	1	0	-2.50653	-3.02874	-2.0982	-2.46166	-2.52378	715.99	67.468	4.3	642.057	592.3	122.902	4.3	107.199	6.723	1.911	11.008	6.874	21.768	9.012	2.806	12.059	8.277	11.127	11.782	2.708	12.984	7.466	22.165	10.418	1.556	17.254	7.797	18.743
0	cART Arm	1	1	29	2	18	206	4112500	6.61411	25490	4.40637	-0.198375	1.25274	0.502129	0.302211	0.464677	1947.59	231.878	8.62333	1297.33	2732.4	1833.79	4.3	170.818	6.943	2.019	10.877	7.645	16.151	7.584	2.261	11.398	7.234	14.402	11.138	2.572	13.206	6.016	24.117	9.725	1.709	14.748	7.252	20.809
0	cART Arm	1	1	22	2	18	409	461347	5.66403	425	2.62839	-0.940547	0.442059	0.882983	-0.111244	0.0683126	1986.05	245.957	4.3	281.307	1673.6	245.083	4.3	64.1637	6.983	1.941	8.388	4.114	14.839	7.053	2.633	11.886	4.21	11.549	8.853	2.055	8.823	5.102	16.441	9.328	1.597	14.614	5.605	18.873
0	cART Arm	1	1	43	2	16	641	4452	3.64856	1	0	0.542076	-0.903934	-0.0646333	0.349346	-0.0192865	1100.8	220.609	4.3	342.733	866.272	139.81	4.3	107.885	7.452	2.127	8.477	6.91	16.843	7.946	2.81	11.68	8.733	14.368	10.204	2.36	9.644	5.588	18.278	9.467	1.795	12.741	7.203	20.331
0	cART Arm	1	1	28	2	19	249	280700	5.44824			-0.514665	0.482352	-1.1877	-1.06351	-0.570882					4636.88	169.213	4.3	166.152	7.129	2.306	7.08	6.15	17.057	7.071	3.164	7.962	6.83	15.439	9.248	2.508	8.795	6.348	22.361	10.585	2.509	12.076	9.949	23.231
0	cART Arm	1	1	27	2	14	534	2063	3.3145			-1.98453	0.164476	-0.374864	0.14278	-0.513034					684.107	22.4839	4.3	68.6876	7.216	1.906	8.511	5.677	16.947	9.042	2.316	11.929	8.722	14.485	9.805	1.868	8.978	3.233	20.477	11.644	1.847	14.607	8.973	19.505
0	cART Arm	1	1	47	2	20	447	31970	4.50474	100	2	-0.184545	1.39166	0.779904	0.761512	0.687134					1411.47	68.2512	4.3	40.8376	5.543	1.402	7.18	4.837	12.885	9.448	3.078	11.324	10.11	17.199	9.259	2.119	10.516	6.234	16.339	11.687	2.127	13.156	9.398	21.82
0	cART Arm	1	1	26	2	14	298	1642350	6.21547			0.383561	-1.4283	-1.72228	0.550768	-0.554061					841.436	49.6052	4.3	25.49	7.814	2.387	9.884	7.715	16.315	8.278	2.735	10.705	7.709	9.311	10.109	2.197	10.746	4.51	20.37	10.487	1.909	15.089	8.604	23.843
0	cART Arm	1	1	22	2	18	265	708317	5.85023	1204	3.08063										4515.87	112.227	4.3	49.1429	6.073	1.684	8.336	5.625	10.406	7.488	2.341	12.078	9.096	15.885	11.223	2.726	9.566	6.743	19.665	9.943	1.878	15.166	9.625	21.477
0	cART Arm	1	1	18	2	14	198	14240700	7.15353												4412.29	56.1188	4.3	80.1792	6.26	1.88	7.416	6.642	13.992	8.115	3.167	11.431	10.576	12.112	9.904	2.843	8.044	7.056	23.854	9.54	1.67	14.087	8.628	15.909
0	cART Arm	1	1	23	2	18	352	61858	4.7914	860	2.9345										1835.29	20.3351	4.3	57.7828	7.081	2.191	8.708	6.911	18.68	7.922	3.205	16.46	7.906	15.448	7.948	2.001	10.394	4.413	16.194	10.285	1.937	17.459	8.966	25.049
0	cART Arm	1	1	40	2	18	320	322660	5.50875												866.487	24.9959	4.3	45.3319
0	cART Arm	1	1	30	2	12	279	330998	5.51983												1715.88	60.8543	4.3	26.5123	6.888	1.888	7.257	5.488	17.597	7.718	2.469	9.618	8.495	12.6	8.51	2.268	10.289	6.561	19.107	10.512	1.672	15.454	8.911	21.012
0	cART Arm	1	1	22	2	15	292	17811300	7.2507												3950.69	174.848	4.3	51.8798
0	cART Arm	1	1	35	2	20	213	7263860	6.86117	1	0	0.331184	-0.519539	-1.07543	0.592282	-0.167876					5089.06	518.054	4.3	135.53	6.586	2.053	7.284	6.005	16.118	8.547	3.639	11.794	10.301	15.445	9.717	2.836	8.506	6.474	20.461	10.516	1.744	15.087	9.322	17.463
0	cART Arm	1	1	25	2	18	214	470496	5.67256			-1.6991	0.0955545	-3.43175	-3.0056	-2.01022					2140.58	210.852	4.3	114.334
0	cART Arm	1	1	35	2	17	466	152807	5.18414												2135.67	200.129	4.3	82.5305
0	cART Arm	1	1	24	2	9	289	2412840	6.38253			-2.73286	-0.368626	0.317844	-2.03337	-1.20425					1368.56	50.3132	4.3	69.8061	7.096	2.058	7.286	6.218	18.554	7.645	2.976	11.401	7.886	14.846	10.541	2.26	11.805	5.09	21.174	11.063	1.531	16.104	9.096	15.822
0	cART Arm	1	1	30	2	23	698	121377	5.08414	1	0	0.0582446	0.230662	0.438862	-1.14859	-0.105204	4665.16	905.867	4.3	343.667	3283.59	80.8295	4.3	53.389	6.629	1.938	8.005	7.503	13.546	8.536	3.666	11.803	8.984	14.37	8.336	2.077	9.197	4.521	13.445	10.1	1.677	12.684	8.773	14.61
0	cART Arm	1	1	21	2	17	538	268663	5.42921	100	2						1253.4	549.467	4.3	727.767	2386.4	478.804	4.3	116.262
0	cART Arm	1	1	21	2	17	515	674135	5.82875			-0.263575	0.192853	0.809269	0.130671	0.217305					3487.92	360.431	4.3	72.9294	6.984	1.901	8.095	6.258	15.461	7.236	2.235	11.161	6.639	9.515	8.869	2.139	10.468	3.143	19.444	9.976	1.667	13.98	7.919	14.763
0	cART Arm	1	1	23	2	16	412	406180	5.60872												3268.87	121.793	4.3	25.9784
0	cART+ Arm	2	1	29	2	21	311	276124	5.4411	200	2.30103						3139.73	535.04	22.5567	484.653	3537.1	967.733	4.3	320.167	7.242	2.333	7.854	6.908	18.379	7.941	3.347	11.62	9.16	13.502	10.002	2.583	9.54	5.956	22.829	9.436	2.004	12.494	7.553	23.404
0	cART+ Arm	2	1	41	2	22	559	913670	5.96079	573	2.75815						3031.19	116.019	6.81667	445.507	1996.6	528.199	72.6975	193.667	5.452	1.497	6.494	5.29	15.308	7.657	2.853	10.406	7.666	13.979	12.615	3.426	11.533	9.245	23.214	12.36	2.706	15.11	9.938	27.643
0	cART+ Arm	2	1	42	2	12	547	2321	3.36568	1	0						644.138	62.175	4.3	220.847	1521	157.13	68.76	124.567	7.827	2.111	8.21	7.747	15.731	8.366	2.543	11.974	6.58	8.941	9.659	2.358	10.837	4.907	13.8	10.51	1.587	14.2	7.39	21.452
0	cART+ Arm	2	1	30	2	18	293	388339	5.58921	245618	5.39026	-1.35445	-0.112812	-0.106955	-1.62323	-0.799363	3550.86	694.338	23.16	568.157	3196.2	476.22	21.96	158.233
0	cART+ Arm	2	1	25	2	18	308	765040	5.88368	1103	3.04258	-0.779628	-0.469359	0.917606	-0.069459	-0.10021	1931.65	124.82	4.3	340.237	1016.7	449.768	21.2883	187.693	7.295	1.951	8.254	6.685	14.908	6.481	2.559	9.695	4.951	12.734	10.744	2.628	12.202	4.981	24.182	9.91	1.537	15.967	6.846	19.945
0	cART+ Arm	2	1	21	2	17	386	511122	5.70852	4969	3.69627	0.687499	0.681347	-0.147276	0.43095	0.41313	2410.33	582.493	4.3	429.34	2499.97	1770.19	4.3	333.84
0	cART+ Arm	2	1	24	2	18	736	334889	5.5249	1345	3.12872	-0.661712	-0.334026	-0.164646	-0.32237	-0.370689	978.604	579.936	4.3	283.97	2693.9	404.76	4.3	128.029	6.732	2.169	9.882	7.208	19.246	6.207	2.628	12.308	5.04	8.976	10.599	2.387	9.699	4.765	20.464	7.896	1.328	12.817	6.169	19.874
0	cART+ Arm	2	1	26	2	12	616	322962	5.50915	2986	3.47509	0.606294	-0.897736	-0.0691481	-1.59231	-0.488224	1795.54	592.845	6.89	255.76	1743.4	369.195	4.3	149.461	6.464	1.739	9.932	6.826	18.406	8.383	2.439	12.496	7.54	18.804	9.329	2.611	12.517	7.412	19.968	8.491	1.484	13.019	7.766	17.87
0	cART+ Arm	2	1	31	2	19	569	117804	5.07116	43395	4.63744	-1.10967	-1.83319	-1.49796	-0.102281	-1.13577	6423.92	741.586	20.7233	2000	3364.6	853.571	4.3	211.31	6.488	1.85	9.508	4.733	16.269	8.175	2.463	11.101	7.076	13.621	8.69	2.148	11.462	5.039	15.711	10.144	1.822	15.673	7.956	20.491
0	cART+ Arm	2	1	21	2	15	464	407556	5.61019			-0.241379	0.788494	0.40496	-1.6771	-0.181255					2838.57	521.108	4.3	117.746	7.739	1.629	8.741	6.944	14.926	7.903	2.275	10.998	7.827	13.187	9.283	2.082	10.89	4.97	17.752	10.772	1.483	14.877	7.954	15.89
0	cART+ Arm	2	1	45	1	6	132	25579700	7.4079	201803	5.30493	0.443086	0.361231	-0.479654	-0.244221	0.0201104	3144.54	842.997	10.9433	2000	5154.37	1771.54	4.3	304.032	8.248	2.417	11.377	5.852	19.297	8.286	3.195	12.451	11.669	18.838	10.039	2.694	12.062	5.026	18.092	10.347	1.865	13.483	8.595	20.781
0	cART+ Arm	2	1	27	2	18	338	23317000	7.36767	355310	5.55061	-2.48316	-2.28825	-0.949809	-1.47697	-1.79955	993.025	316.479	4.3	334.77	1749.49	698.298	4.3	171.377
0	cART+ Arm	2	1	20	2	12	339	70017	4.8452	645	2.80956	-0.0882013	1.1243	1.32016	0.599302	0.73889	1352.79	1050.61	4.3	1150.77	2688.38	756.063	4.3	106.169	6.906	1.841	9.738	6.25	17.688	7.644	3.195	13.947	8.888	13.322	9.495	2.1	11.692	5.478	14.765	10.229	1.581	15.634	7.88	19.996
0	cART+ Arm	2	1	38	2	16	649	604	2.78104	1	0	-0.443506	-0.990713	0.363264	-1.2837	-0.588665	1148.62	543.461	4.3	1673.7	1234.13	113.099	4.3	59.3465	6.097	1.799	8.256	6.592	12.792	9.189	3.601	11.977	10.134	14.316	9.786	2.659	8.276	7.194	17.69	10.226	1.894	12.976	8.467	20.411
0	cART+ Arm	2	1	40	2	18	413	249679	5.39738			0.180029	-1.97009	-0.728369	-1.18323	-0.925416					2033.84	107.051	4.3	95.3175	7.322	2.406	6.555	6.862	15.935	9.913	2.847	11.409	8.124	16.157	9.473	2.198	8.473	3.835	19.71	11.079	1.944	15.232	7.761	15.695
0	cART+ Arm	2	1	25	2	18	618	54000	4.73239			1.26239	0.879592	0.396025	0.979574	0.879394					817.119	16.8824	4.3	26.6299	7.38	1.969	9.417	6.133	16.575	7.882	3.02	12.029	6.13	13.504	9.587	2.316	9.712	4.807	19.541	9.63	1.444	14.946	6.068	20.435
0	cART+ Arm	2	1	26	1	18	342	662035	5.82088			1.37337	-0.30731	-0.441631	-1.0877	-0.115819					4607.81	200.884	4.3	36.3979	7.85	2.189	9.017	6.702	17.914	8.896	2.89	13.476	8.942	16.859	8.299	1.698	9.768	4.303	14.034	10.458	1.444	15.897	8.742	19.506
0	cART+ Arm	2	1	29	2	18	389	277036	5.44254	2024	3.30621	-0.220571	-0.862219	0.984619	-0.276187	-0.0935894					2254.11	42.5104	4.3	16.1131	7.141	2.118	10.215	7.056	17.66	8.364	3.275	11.752	8.957	14.901	10.104	2.477	9.136	7.147	20.013	10.268	1.49	14.017	7.87	14.989
0	cART+ Arm	2	1	38	2	18	565	11494	4.06047	132	2.12057	-0.0416171	0.367166	-0.676175	0.737658	0.096758					1323.82	30.3545	4.3	28.2195	7.274	1.774	8.277	4.45	15.564	8.915	3.095	12.766	6.003	18.533	9.658	2.323	8.092	3.082	20.74	11.099	1.586	16.613	7.267	21.023
0	cART+ Arm	2	1	30	2	21	496	624066	5.79523			-0.861582	0.508874	-0.80966	0.687269	-0.118775					2130.94	51.5286	4.3	59.8881
0	cART+ Arm	2	1	28	2	14	371	1089	3.03703			0.277608	0.306835	-0.0170632	1.11497	0.420588					227.069	4.4	4.3	25.3976	8.115	2.242	8.926	6.9	16.745	8.411	3.092	13.968	8.512	15.85	11.617	2.684	12.978	6.153	23.87	9.82	1.617	16.768	6.685	23.243
0	cART+ Arm	2	1	34	2	11	359	13557900	7.13219	20060	4.30233						4420.31	1737.47	4.3	900.4	5001.4	141.397	4.3	71.4778	7.494	2.312	6.68	6.21	19.033	9.401	3.712	13.046	7.405	15.469	11.03	2.299	10.155	4.794	20.82	10.164	1.628	14.238	8.168	22.02
0	cART+ Arm	2	1	35	2	18	532	2202820	6.34298	9392	3.97276	0.238165	0.392797	-0.0521639	-0.503327	0.0188677	1130.89	608.8	4.3	371.767	2405.08	127.51	4.3	61.7704	6.812	1.696	8.004	5.487	15.079	8.311	2.71	13.226	7.537	12.871	10.092	2.258	11.02	4.334	18.804	9.776	1.351	15.779	6.782	15.151
0	cART+ Arm	2	1	25	2	13	362	237077	5.37489			-0.212116	0.335746	-1.43597	-0.356928	-0.417316					2066.03	97.8675	4.3	37.3956
0	cART+ Arm	2	1	33	2	18	350	2656900	6.42438			1.24588	0.553224	0.985006	1.46078	1.06122					3230.83	186.507	4.3	45.799
0	cART+ Arm	2	1	37	2	24	1170	4801	3.68133			1.37194	0.034711	0.532093	0.983023	0.730442					1156.37	35.395	4.3	37.0688
0	cART+ Arm	2	1	49	2	18	265	1170480	6.06836			-4.39053	-3.65384	-2.67879	-0.455668	-2.79471					1722.43	81.0889	4.3	63.3549	8.006	2.196	9.374	5.99	18.342	8.312	2.842	12.442	8.936	17.305	9.769	2.437	8.829	5.966	22.722	10.332	1.812	13.75	7.215	20.807
0	cART+ Arm	2	1	24	2	15	392	47887300	7.68022	9164	3.96209	-0.79244	-1.82574	-0.489533	-0.585256	-0.923241	5415.25	1152.73	4.3	405.433	5527.83	48.7139	4.3	51.5649
0	cART+ Arm	2	1	24	2	18	295	30551900	7.48504			-1.32481	0.470965	-2.23422	0.687076	-0.600247					4956.22	1548.05	4.3	136.986
0	cART+ Arm	2	1	24	2	14	506	428341	5.63179												218.151	49.6067	4.3	35.4315
0	cART+ Arm	2	1	23	2	16	425	663357	5.82175												2264.61	303.616	4.3	82.6533
0	cART+ Arm	2	1	24	2	14	179	693750	5.8412												7788.81	3899.38	7.77289	362.605
4	Control Arm	0	0		2
4	Control Arm	0	0		1
4	Control Arm	0	0		1
4	Control Arm	0	0		2
4	Control Arm	0	0		2
4	Control Arm	0	0		2
4	Control Arm	0	0		2
4	Control Arm	0	0		1
4	Control Arm	0	0		1
4	Control Arm	0	0		2
4	Control Arm	0	0		2
4	Control Arm	0	0		1
4	Control Arm	0	0		2
4	Control Arm	0	0		1
4	Control Arm	0	0		1
4	Control Arm	0	0		1
4	Control Arm	0	0		2
4	Control Arm	0	0		1
4	Control Arm	0	0		2
4	Control Arm	0	0		2
4	Control Arm	0	0		1
4	Control Arm	0	0		1
4	Control Arm	0	0		1
4	Control Arm	0	0		2
4	Control Arm	0	0		1
4	Control Arm	0	0		2
4	Control Arm	0	0		2
4	Control Arm	0	0		2
4	Control Arm	0	0		2
4	cART Arm	1	1		2		723	211	2.32428												1500.8	67.532	4.3	63.6063	8.108	2.033	8.909	7.308	17.481	6.825	2.174	11.561	6.639	13.855	8.335	1.99	10.797	4.765	11.823	10.195	1.487	14.346	6.801	20.149
4	cART Arm	1	1		2		644	50	1.69897												376.786	35.3968	4.3	83.0762	8.837	2.188	8.735	7.518	15.653	10.409	3.072	12.033	9.72	12.453	8.251	1.529	8.023	4.16	17.909	9.42	1.595	11.39	6.943	20.496
4	cART Arm	1	1		2		780	716	2.85491			0.77051	0.392717	0.593673	-0.595477	0.290356					1632.62	46.4283	4.3	67.4213	7.039	1.617	9.182	5.89	17.753	8.449	2.825	13.643	9.49	13.723	9.426	2.319	10.349	5.977	16.765	10.999	1.772	16.142	10.686	21.601
4	cART Arm	1	1		2		845	927	2.96708			1.48312	1.19443	0.556795	-1.32181	0.478133					1291	205.46	4.3	891.863	7.282	2.122	7.978	6.707	15.615	9.472	3.172	12.582	10.944	11.819	11.305	2.833	13.141	7.252	18.973	9.031	1.464	12.872	7.246	15.772
4	cART Arm	1	1		1		437	631	2.80003			1.13199	0.748638	0.215092	0.720064	0.703945					1272.96	139.162	4.3	1109.64	7.897	2.154	9.766	8.05	16.93	9.616	2.986	11.455	13.816	17.46	7.957	1.93	10.359	3.77	14.683	10.019	1.6	12.279	7.716	22.827
4	cART Arm	1	1		2		959	75	1.87506												794.068	4.4	4.3	891.863	7.961	2.452	10.42	7.981	19.28	7.662	2.649	10.853	8.374	14.237	10.022	2.401	11.895	4.819	19.085	10.043	1.789	15.606	7.538	19.04
4	cART Arm	1	1		2		537	4040	3.60638			0.747543	-1.04896	0.307322	-0.519763	-0.128464					979.739	42.9969	4.3	706.577	7.533	2.211	9.011	5.715	20.013	8.656	3.367	14.327	10.513	12.141	11.159	2.773	12.899	5.764	22.562	10.127	1.915	14.143	6.546	19.367
4	cART Arm	1	1		2		378	1101	3.04179			0.961276	-0.425764	0.273933	0.717603	0.381762					1562.18	64.9114	4.3	642.279	6.433	2.105	8.653	5.623	18.177	7.32	2.208	11.821	7.6	11.988	9.654	2.409	11.409	4.784	19.022	10.153	1.679	15.828	7.809	16
4	cART Arm	1	1		1		825	50	1.69897			-2.05715	-2.4829	-2.1738	-1.47772	-2.04789					808.523	74.5279	4.3	687.218	8.19	2.009	11.908	6.617	17.712	8.649	2.628	13.33	8.534	10.541	10.26	2.158	14.15	5.639	16.869	10.619	1.444	18.507	8.356	20.787
4	cART Arm	1	1		2		432	10282	4.01208			1.4136	0.847182	1.65363	1.4832	1.3494					1314.81	70.4594	4.3	620.156	7.666	1.847	10.654	6.528	17.744	7.462	2.392	13.405	7.804	14.798	10.364	2.335	13.076	5.44	21.284	10.066	1.581	13.831	7.124	20.176
4	cART Arm	1	1		2		730	50	1.69897												521.457	27.0002	4.3	585.587	5.865	1.393	7.98	4.865	16.623	6.97	2.229	11.465	6.028	10.83	8.866	1.715	9.305	2.496	21.199	9.881	1.735	14.38	6.161	17.297
4	cART Arm	1	1		2		537	963	2.98363												1157.77	522.342	7.2589	70.7	8.712	2.542	11.6	10.796	14.733	7.348	1.713	7.968	6.343	13.491	9.735	2.405	7.048	6.51	20.179	9.909	1.66	14.929	8.724	17.154
4	cART Arm	1	1		2		485	939	2.97267												2051.36	59.983	4.3	147.102	5.852	1.786	6.09	5.566	16.282	5.488	2.595	7.904	6.284	16.249	8.661	2.242	10.404	4.542	15.222	8.109	1.573	11.905	7.406	20.41
4	cART Arm	1	1		2		648	356	2.55145												1585.11	26.4517	4.3	60.1017	8.875	2.589	8.94	8.844	18.273	9.24	2.843	12.936	8.562	16.46	8.047	1.709	7.907	3.76	13.089	11.46	1.601	15.578	8.198	21.609
4	cART Arm	1	1		2		557	282	2.45025			1.29206	1.52412	1.62394	0.493415	1.23338					1273.27	9.49888	4.3	24.227	7.174	1.781	7.849	6.336	13.618	9.258	3.084	11.042	10.418	12.622	11.036	2.508	10.251	6.352	19.429	9.704	1.807	12.679	8.547	22.358
4	cART Arm	1	1		2		473	722	2.85854												872.735	13.9551	4.3	35.9004	7.501	2.128	10.291	7.026	18.851	8.199	2.537	11.926	8.452	11.756	9.55	2.09	11.116	4.485	16.485	9.565	1.457	14.409	6.72	20.913
4	cART Arm	1	1		2		450	4094	3.61215												2502.98	28.9657	4.3	27.9778	6.889	1.82	10.865	7.687	17.242	7.238	2.244	13.079	9.739	15.544	8.807	1.901	11.647	5.482	19.905	10.206	1.437	16.726	9.069	15.395
4	cART Arm	1	1		2		443	4131	3.61606												1302.19	5.87348	4.3	60.5152	7.837	2.279	9.119	7.928	16.569	8.93	3.53	12.23	12.495	16.176	8.129	2.114	8.656	6.735	20.722	8.717	1.671	13.109	8.324	19.661
4	cART Arm	1	1		2		496	985	2.99344			1.91716	0.780172	0.163715	0.768447	0.907374					1124.6	4.4	4.3	57.6036	6.153	1.907	10.267	6.19	17.062	7.723	2.654	15.689	7.438	15.942	10.009	2.119	10.652	4.162	22.947	10.651	1.802	18	8.549	21.841
4	cART Arm	1	1		2		452	31812	4.50259												12231.5	1277.63	4.3	87.138
4	cART Arm	1	1		2		394	3724	3.57101												824.287	11.7265	4.3	27.1533	7.16	2.06	8.595	7.388	18.174	8.386	2.601	13.719	8.844	14.863	10.133	2.609	9.507	5.459	18.465	9.3	1.596	14.637	8.001	15.874
4	cART Arm	1	1		2		570	1538	3.18696												1500.96	42.5239	4.3	35.9908	6.312	1.928	8.234	6.014	17.595	7.404	2.463	10.527	6.82	15.062	10.723	2.527	10.239	8.298	17.179	9.391	1.489	14.817	8.338	19.174
4	cART Arm	1	1		2		428	3624	3.55919												1509.95	91.1892	4.3	47.1529	6.276	1.803	7.505	7.069	14.565	8.373	3.004	12.158	9.92	15.227	7.607	1.907	9.243	5.041	14.734	9.418	1.436	15.258	7.577	18.052
4	cART Arm	1	1		2		851	1525	3.18327												1296.75	90.7035	4.3	54.7161	7.249	1.927	7.85	6.747	15.077	7.585	2.949	11.568	8.166	13.176	10.338	2.21	7.977	5.309	21.67	8.826	1.014	12.198	6.01	15.274
4	cART Arm	1	1		2		689	484	2.68485												936.182	14.5234	4.3	35.9931
4	cART Arm	1	1		2		495	807	2.90687												791.305	7.34814	4.3	49.5183
4	cART Arm	1	1		2		939	424	2.62737												1370.03	10.5467	4.3	33.5016
4	cART Arm	1	1		2		531	7390	3.86864												1620.12	37.371	4.3	50.0782	6.988	1.995	8.494	6.08	14.562	7.83	3.514	9.164	10.434	15.492	9.384	2.479	8.055	6.197	17.886	11.013	1.791	15.657	8.829	18.181
4	cART Arm	1	1	21	2	17	757	10952	4.03949												2061.91	148.725	4.3	111.096
4	cART Arm	1	1	23	2	16	623	192	2.2833												1929.93	52.5622	4.3	45.9767
4	cART+ Arm	2	1		2		575	50	1.69897												1763.23	140.148	4.3	83.734
4	cART+ Arm	2	1		2		1004	100	2												1943.57	112.713	4.3	92.1535	6.09	1.715	7.887	6.755	16.066	8.086	2.502	10.651	7.733	9.866	10.982	2.748	10.609	7.248	19.969	9.777	1.851	14.597	8.981	15.683
4	cART+ Arm	2	1		2		403	50	1.69897												989.894	73.3835	4.3	57.3575
4	cART+ Arm	2	1		2		638	6810	3.83315												2563.91	46.0446	4.3	42.2288
4	cART+ Arm	2	1		2		362	149	2.17319			1.39695	-0.21446	1.11976	-6.64076	-1.08463					2892.04	147.055	4.3	105.901
4	cART+ Arm	2	1		2		575	98	1.99123												865.364	143.985	4.3	54.7264
4	cART+ Arm	2	1		2		771	64	1.80618			-0.653389	-0.775939	0.774646	-1.03272	-0.421851					952.588	32.519	4.3	39.9266	7.732	2.259	10.204	7.355	19.384	7.5	2.908	14.632	9.45	16.936	11.997	3.268	10.247	7.126	24.533	8.718	1.602	15.747	6.655	19.865
4	cART+ Arm	2	1		2		954	136	2.13354			0.115198	0.387322	0.04408	0.593235	0.284959					1092.97	52.336	4.3	748.059	6.812	1.71	9.877	6.494	20.802	8.435	2.826	13.957	11.035	16.081	9.785	2.41	13.661	7.33	17.203	9.126	1.373	15.713	7.693	16.694
4	cART+ Arm	2	1		2		728	489	2.68931			1.05931	0.0204946	-0.472848	1.18481	0.447943					971.101	66.2059	4.3	679.613
4	cART+ Arm	2	1		2		663	335	2.52504			0.48692	0.0846744	0.298857	-0.735826	0.0336566					1382.69	65.1888	4.3	924.357	6.689	1.498	7.895	6.69	16.962	7.624	2.33	12.109	7.837	9.02	11.244	2.498	13.379	7.084	20.414	8.915	1.183	13.723	7.032	15.194
4	cART+ Arm	2	1		1		311	862	2.93551												1619.6	122.148	4.3	730.774	7.694	1.863	10.462	5.367	18.349	8.472	2.615	12.657	11.818	15.219	10.958	2.298	11.505	6.561	19.546	11.111	1.615	14.987	7.14	17.846
4	cART+ Arm	2	1		2		1138	175	2.24304
4	cART+ Arm	2	1		2		526	156	2.19312			1.3093	0.87134	0.507183	1.6261	1.07848					2810.19	316.512	4.3	481.191	6.994	1.824	8.151	7.733	13.872	8.236	2.452	12.564	8.176	15.807	9.78	2.092	8.564	5.178	21.001	9.614	1.246	15.38	7.773	13.303
4	cART+ Arm	2	1		2		527	56	1.74819												2458.04	122.456	7.02474	95.9212	7.842	2.229	8.699	8.011	14.627	9.451	3.691	13.979	11.688	16.057	9.171	2.341	10.918	7.211	20.038	9.856	1.87	14.555	8.374	12.831
4	cART+ Arm	2	1		2		685	283	2.45179												1413.49	19.5275	4.3	64.0593	6.746	2.584	8.544	6.169	17.183	9.189	2.828	12.474	7.542	15.903	10.543	2.635	7.172	8.082	16.024	10.47	1.723	13.784	7.689	18.689
4	cART+ Arm	2	1		2		502	1119	3.04883												700.992	25.9849	4.3	37.3623	8.117	1.821	10.735	7.693	17.997	8.108	2.433	12.292	5.622	15.207	11.414	2.347	11.623	6.351	19.968	8.906	1.083	14.147	6.003	16.001
4	cART+ Arm	2	1		1		676	787	2.89597												281.245	26.034	4.3	25.1838	7.427	2.255	9.594	6.624	18.778	8.597	2.289	13.045	7.229	14.062	10.522	2.222	9.869	7.186	20.009	10.023	1.349	16.102	7.871	20.256
4	cART+ Arm	2	1		2		561	50	1.69897			1.42885	0.616809	1.31186	-0.0100798	0.836862					1678.32	21.1086	4.3	15.6155	7.76	1.791	7.799	7.682	17.754	8.882	3.166	12.658	10.613	15.667	8.559	1.828	9.497	5.414	17.188	10.394	1.486	16.187	9.395	20.453
4	cART+ Arm	2	1		2		552	50	1.69897												1994.4	49.4557	4.3	44.6137	7.661	1.859	9.854	6.099	16.252	8.95	2.837	11.46	5.957	16.492	9.774	2.127	10.138	5.131	18.466	10.504	1.329	15.891	7.4	16.527
4	cART+ Arm	2	1		2		749	50	1.69897												1176.48	8.58811	4.3	48.3763
4	cART+ Arm	2	1		2		323	50	1.69897			1.3789	0.842321	0.202599	0.0441955	0.617004					894.892	17.9659	4.3	25.1736	7.27	1.605	9.695	5.468	20.273	7.531	2.653	12.203	6.95	9.741	9.605	2.169	11.63	4.656	18.68	10.666	1.337	16.918	6.492	19.655
4	cART+ Arm	2	1		2		540	190	2.27875												1629.88	7.52964	4.3	32.0528
4	cART+ Arm	2	1		2		849	50	1.69897												1018.01	16.2319	4.3	28.3897	7.321	1.573	9.985	7.089	14.891	8.447	2.576	13.351	9.612	16.268	11.813	2.387	12.104	7.589	21.76	11.909	1.613	17.037	8.959	18.283
4	cART+ Arm	2	1		2		903	50	1.69897												1044.79	15.5422	4.3	35.8082
4	cART+ Arm	2	1		2		609	643	2.80821												812.813	44.5625	4.3	31.2797
4	cART+ Arm	2	1		2
4	cART+ Arm	2	1		2		476	268	2.42813												1073.82	33.5421	4.3	31.8999	6.252	1.556	8.418	4.734	19.087	8.851	2.592	14.379	9.905	12.673	9.813	2.166	10.188	6.37	20.274	8.711	1.419	13.553	6.299	21.575
4	cART+ Arm	2	1		2		417	58	1.76343												1684.16	25.0701	4.3	41.6434	7.011	1.709	7.661	6.206	16.85	7.46	2.453	10.545	8.107	14.476	8.834	1.762	9.841	4.761	18.903	10.254	1.362	14.565	7.507	19.546
4	cART+ Arm	2	1		2		597	2402	3.38057												2802.48	68.3871	4.3	71.8354
4	cART+ Arm	2	1		2		880	50	1.69897												836.296	21.9104	4.3	51.7191
4	cART+ Arm	2	1		2		640	50	1.69897												3016.14	150.053	4.3	103.803	8.054	1.932	10.167	6.387	16.833	8.873	3.115	13.838	9.92	14.757	8.036	1.937	9.427	4.495	15.608	9.626	1.383	16.061	7.981	18.18
4	cART+ Arm	2	1	24	2	14	696	2899	3.46225												2750.4	124.794	4.3	72.2123
12	Control Arm	0	0		2
12	Control Arm	0	0		1
12	Control Arm	0	0		1
12	Control Arm	0	0		2
12	Control Arm	0	0		2
12	Control Arm	0	0		2
12	Control Arm	0	0		2
12	Control Arm	0	0		1
12	Control Arm	0	0		1
12	Control Arm	0	0		2
12	Control Arm	0	0		2
12	Control Arm	0	0		1
12	Control Arm	0	0		2
12	Control Arm	0	0		1
12	Control Arm	0	0		1
12	Control Arm	0	0		1
12	Control Arm	0	0		2
12	Control Arm	0	0		1
12	Control Arm	0	0		2
12	Control Arm	0	0		2
12	Control Arm	0	0		1
12	Control Arm	0	0		1
12	Control Arm	0	0		1
12	Control Arm	0	0		2
12	Control Arm	0	0		1
12	Control Arm	0	0		2
12	Control Arm	0	0		2
12	Control Arm	0	0		2
12	Control Arm	0	0		2
12	cART Arm	1	1		2		534	50	1.69897			0.313183	-0.349109	1.05181	1.7262	0.68552					2633.98	69.9913	4.3	33.3426	6.912	1.894	8.754	5.268	16.12	8.227	2.672	13.415	5.371	8.727	9.127	2.367	10.09	5.285	19.521	9.656	1.36	13.781	8.261	22.571
12	cART Arm	1	1		2		467	50	1.69897			0.662586	1.78398	0.701301	-1.39983	0.43701					1120.3	191.78	4.3	44.522	7.494	2.138	9.244	7.171	14.277	7.477	3.255	12.319	11.353	14.66	9.071	2.185	9.741	6.624	17.783	9.621	1.497	13.38	7.536	16.943
12	cART Arm	1	1		2		556	62	1.79239			0.594092	0.636848	-0.0444005	0.534846	0.430346									6.575	1.777	10.19	6.255	16.371	8.5	2.863	12.573	9.4	16.894	8.615	2.189	11.999	5.891	18.533	9.525	1.852	15.25	8.793	20.184
12	cART Arm	1	1		2		751	50	1.69897			1.42466	0.86657	-2.59564	1.11552	0.20278					1748.48	122.253	4.3	89.219	6.323	2.002	8.483	5.84	12.975	8.409	3.72	11.12	11.274	17.567	10.976	3.08	13.003	6.607	20.686	9.14	1.934	14.402	7.636	19.367
12	cART Arm	1	1		1		546	50	1.69897			1.3914	0.550238	0.0900015	1.41722	0.862215					1247.04	113.573	4.3	81.177	6.677	1.922	10.438	6.577	14.337	7.504	2.855	12.565	10.066	15.37	11.031	2.681	13.041	6.199	20.975	9.127	1.387	15.085	8.007	13.161
12	cART Arm	1	1		2		776	50	1.69897			0.957063	1.17052	0.853464	1.67307	1.16353					1958.98	59.5145	4.3	66.4917	6.927	2.188	9.634	7.287	16.04	7.381	2.559	12.212	8.616	11.068	10.569	2.346	11.317	4.153	20.917	9.954	1.734	15.224	8.483	17.252
12	cART Arm	1	1		2		565	50	1.69897			0.332259	0.472656	0.74579	1.19521	0.686478					1139.77	93.2393	4.3	106.235	6.406	1.757	9.067	5.298	17.848	8.664	3.12	13.818	5.98	14.659	11.046	2.931	14.14	4.832	21.164	9.242	1.918	14.204	6.499	21.64
12	cART Arm	1	1		2		403	50	1.69897			0.368866	-0.398387	-0.0872646	0.389999	0.0683035					2014.64	148.166	4.3	80.6526	6.216	2.133	8.484	5.705	15.47	8.298	2.766	12.993	6.787	12.055	9.877	2.444	9.259	4.53	20.008	10.8	1.63	16.389	7.923	18.296
12	cART Arm	1	1		1		987	50	1.69897			1.0106	-2.84319	-1.82454	-1.3478	-1.25123					1453.48	82.3284	4.3	68.8227	7.745	1.798	10.569	6.61	19.138	9.068	2.919	13.535	8.757	17.734	10.19	2.014	14.204	6.68	16.658	10.487	1.448	18.014	7.537	22.977
12	cART Arm	1	1		2		525	67	1.82607			0.638129	1.43582	0.541219	0.715666	0.832707					1532.42	177.214	4.3	169.661	7.916	2.06	9.657	6.611	13.259	7.455	2.578	12.004	6.946	13.726	8.674	1.961	9.944	4.874	18.192	9.01	1.427	14.289	7.048	14.258
12	cART Arm	1	1		2		526	50	1.69897			-0.0374554	0.373735	-2.22416	0.845421	-0.260616					1850.19	111.909	4.3	94.3804	7.433	1.643	9.079	6.27	14.968	6.644	2.474	12.273	5.207	9.228	9.866	2.234	9.492	5.539	18.425	8.85	1.444	13.855	5.47	15.563
12	cART Arm	1	1		2		552	50	1.69897			-0.206753	0.101916	0.316892	0.965134	0.294297					791.637	212.053	4.3	194.133	6.76	1.763	8.061	5.727	15.608	8.67	2.656	13.398	8.08	12.729	10.608	2.561	10.109	5.046	21.709	9.642	1.732	13.228	7.028	21.757
12	cART Arm	1	1		2		496	50	1.69897			-0.0277448	-0.421182	-0.084231	-1.61552	-0.537169					855.721	21.0057	4.3	87.2682	8.163	2.398	5.371	6.891	20.71	7.685	3.36	8.998	6.976	18.511	7.554	2.029	7.605	5.613	19.808	10.561	2.272	14.403	9.16	23.564
12	cART Arm	1	1		2		885	50	1.69897			0.415269	0.447003	-1.43921	-0.0225386	-0.149869					989.358	9.88047	4.3	61.9799	7.091	1.881	8.77	7.056	14.911	9.471	2.732	12.857	7.672	14.731	9.817	2.332	10.085	5.201	15.712	10.726	1.406	15.479	8.37	16.305
12	cART Arm	1	1		2		761	50	1.69897												1268.75	17.1801	4.3	46.2342	6.158	1.824	6.813	7.422	14.957	9.552	3.09	11.678	10.483	13.821	10.674	2.848	12.368	7.252	22.143	8.937	1.584	12.112	7.809	17.876
12	cART Arm	1	1		2		582	215	2.33244			-1.3666	-1.12551	-2.72322	0.214064	-1.25031					398.464	14.4242	4.3	28.2457
12	cART Arm	1	1		2		522	432	2.63548			2.45541	0.279572	-5.04316	2.0352	-0.0682429					1345.72	10.9648	4.3	25.1456	6.5	1.708	9.26	6.536	11.52	8.277	2.453	14.467	8.484	13.833	10.639	2.44	12.094	7.027	20.056	10.463	1.445	16.642	9.526	21.588
12	cART Arm	1	1		2		438	942	2.97405			-2.92912	-2.05116	-0.179529	-3.41616	-2.14399					1094.52	4.4	4.3	53.0796	6.917	2.251	8.557	7.826	16.449	7.878	3.116	10.518	10.961	13.295	9.123	2.059	10.55	6.101	13.227	8.859	1.41	12.976	7.946	17.475
12	cART Arm	1	1		2		491	207	2.31597			1.79509	0.365414	0.298857	1.45681	0.979041					979.611	4.4	4.3	57.6484	7.2	2.175	9.693	6.333	18.02	6.827	2.386	12.839	6.926	15.572	10.053	2.318	13.123	6.927	20.356	8.498	1.362	13.458	6.563	19
12	cART Arm	1	1		2		480	1157	3.06333												1742.8	108.439	4.3	62.6862
12	cART Arm	1	1		2		347	614	2.78817												1444.7	30.4889	4.3	29.626	6.744	1.661	9.443	6.955	13.728	8.223	2.913	12.315	8.497	11.305	9.108	2.339	9.794	5.093	23.131	9.436	1.605	13.815	7.836	19.07
12	cART Arm	1	1		2		464	250	2.39794			0.670835	0.641563	3.64928	-0.247174	1.17863					763.254	23.5764	4.3	41.3024
12	cART Arm	1	1		2		603	329	2.5172			0.365818	0.890471	-0.432836	1.24757	0.517757					1412.28	44.9268	4.3	48.6469	5.951	2.075	7.711	5.96	15.9	8.674	3.207	11.12	9.242	14.162	9.444	2.194	10.39	4.164	17.886	9.719	1.467	14.541	7.618	19.437
12	cART Arm	1	1		2		643	156	2.19312			-0.188977	0.179622	-1.10182	-0.48685	-0.399507					809.985	26.3489	4.3	48.3201
12	cART Arm	1	1		2		676	50	1.69897			-1.14377	-2.31237	-9.34048	-1.06717	-3.46595					1004.16	4.45211	4.3	29.097	7.839	1.944	10.394	7.728	18.119	8.361	2.633	11.833	8.7	13.384	8.339	1.857	8.822	4.523	17.013	9.629	1.39	14.278	7.992	16.78
12	cART Arm	1	1		2		464	50	1.69897			0.445303	-0.521478	0.344649	-4.45252	-1.04601					638.195	6.9159	4.3	65.713
12	cART Arm	1	1		2		1266	50	1.69897			-0.0830251	-0.00232359	1.36418	-0.580393	0.17461					1378.92	8.21263	4.3	45.4251	6.288	1.772	8.281	5.815	14.404	8.421	3.166	12.105	9.39	13.971	7.808	1.715	9.196	5.265	10.572	10.846	1.618	15.873	8.985	20.324
12	cART Arm	1	1		2		572	722	2.85854			0.464022	-0.31448	-0.58092	0.485827	0.0136122					1122.52	89.4438	4.3	59.3159	6.712	1.977	5.486	6.528	13.734	8.465	3.747	8.809	10.334	15.355	7.204	1.666	7.477	3.93	10.555	10.253	1.864	11.01	8.444	18.311
12	cART Arm	1	1	21	2	17	636	943	2.97451			1.27903	0.7828	1.33979	1.36664	1.19206					1217.99	36.8968	4.3	71.8962	8.067	1.883	10.654	6.679	16.797	9.05	2.919	14.735	8.067	14.653	8.198	1.886	10.046	4.613	15.094	10.545	1.693	16.06	8.392	16.766
12	cART Arm	1	1	23	2	16	627	50	1.69897			1.06817	0.516076	0.295507	0.231835	0.527898					2033.09	51.6732	4.3	65.9749
12	cART+ Arm	2	1		2		560	50	1.69897			-0.110979	0.3987	0.345766	0.687076	0.330141					3036.25	43.713	4.3	34.3738	7.498	2.41	9.901	7.405	17.953	6.876	2.613	12.839	7.433	10.072	10.674	2.79	11.372	4.471	21.043	11.043	1.602	16.147	8.528	19.119
12	cART+ Arm	2	1		2		766	50	1.69897			0.712823	1.10516	0.838767	0.555381	0.803033					2291.17	66.9592	4.3	73.56	7.098	2.011	8.361	7.272	14.659	6.777	2.745	10.324	8.308	14.518	10.225	2.559	9.074	5.207	19.832	11.549	2.056	14.143	9.054	22.531
12	cART+ Arm	2	1		2		523	50	1.69897			1.25162	1.14367	0.511129	1.23508	1.03537					2012.11	48.6402	4.3	46.5765
12	cART+ Arm	2	1		2		674	419	2.62221			-0.420367	-0.402243	-0.935507	0.174886	-0.395808					2352.14	104.482	4.3	37.1237
12	cART+ Arm	2	1		2		501	54	1.73239			1.15834	0.78718	0.725504	1.08514	0.939041					1105.7	187.642	4.3	77.518	5.917	1.613	8.146	5.46	16.419	5.761	2.217	11.137	3.963	11.379	7.884	1.79	11.746	3.76	20.083	9.065	1.469	12.537	5.64	20.592
12	cART+ Arm	2	1		2		720	50	1.69897			0.721528	0.816587	1.00992	0.309615	0.714411					799.616		4.3	156.467
12	cART+ Arm	2	1		2		794	50	1.69897												2045.1		4.3	150.403	7.194	1.976	9.621	6.68	18.841	6.682	2.341	10.731	4.067	10.987	10.248	2.379	10.234	4.603	21.837	8.489	1.505	14.749	7.169	17.078
12	cART+ Arm	2	1		2		864	50	1.69897			1.01155	0.594289	-0.044238	-0.0179886	0.385902					981.387	94.9023	4.3	77.3321	7.358	1.998	10.059	6.875	17.877	7.94	2.779	12.418	9.216	15.316	9.379	2.254	12.127	5.743	16.025	9.028	1.52	14.434	8.053	14.784
12	cART+ Arm	2	1		2		723	50	1.69897			1.58785	0.0769397	0.865234	0.968276	0.874576					1678.91	161.557	4.3	71.4451
12	cART+ Arm	2	1		2		826	50	1.69897			0.980777	0.317675	-0.800148	-0.137635	0.0901672					1806.67	149.406	4.3	61.7715	7.236	1.84	9.691	6.922	17.59	7.806	2.206	12.075	6.775	14.285	9.259	2.096	11.291	4.985	17.511	10.793	1.594	15.857	8.192	15.658
12	cART+ Arm	2	1		1		507	50	1.69897			1.15779	0.657546	-0.574028	0.110306	0.337903					1103.08	197.122	4.3	179.659	8.655	1.843	9.834	7.707	19.211	8.533	2.958	12.946	8.988	15.622	11.41	2.757	13.322	6.808	24.312	10.929	1.833	14.752	7.802	23.203
12	cART+ Arm	2	1		2		483	60	1.77815			0.438367	-1.53407	-1.76736	-2.39185	-1.31373					3639.41	682.01	4.3	119.897
12	cART+ Arm	2	1		2		709	50	1.69897			0.992211	0.393892	1.52284	1.5988	1.12693					1859.3	419.884	4.3	165.557	7.56	1.822	8.761	7.048	13.397	8.008	2.511	12.838	7.121	12.878	10.532	2.254	12.374	6.486	16.838	9.154	1.431	13.426	7.313	18.037
12	cART+ Arm	2	1		2		578	50	1.69897			0.48449	-0.138632	0.904545	-0.750158	0.125061					1592.38	120.238	21.878	116.312	8.159	2.323	9.665	8.314	16.452	8.584	3.607	12.201	11.102	13.36	11.178	2.686	7.869	6.681	22.253	10.402	1.883	14.744	7.89	18.672
12	cART+ Arm	2	1		2		798	50	1.69897			-0.207245	-2.03975	0.605177	0.0207122	-0.405276					963.82	14.704	4.3	82.1703
12	cART+ Arm	2	1		2		540	66	1.81954												774.785	26.9962	4.3	50.5096	7.832	1.892	11.276	6.816	17.04	8.409	3.129	14.058	7.354	16.779	9.786	2.441	8.507	4.88	18.185	9.901	1.309	15.238	7.274	20.018
12	cART+ Arm	2	1		1		774	50	1.69897												568.324	22.2227	4.3	19.2515	8.144	2.111	8.454	7.589	18.591	8.371	2.69	12.025	8.635	13.875	9.669	2.127	10.387	5.821	15.661	10.062	1.249	15.509	8.419	18.78
12	cART+ Arm	2	1		2		556	50	1.69897			1.53567	0.311105	1.38223	0.535329	0.941083					1391.97	12.0788	4.3	21.4713
12	cART+ Arm	2	1		2		442	50	1.69897			1.28458	0.0807327	0.267585	1.51838	0.787821					1554.19	9.6246	4.3	34.4457	6.646	1.392	8.305	4.158	16.521	8.617	3.034	11.769	7.212	14.098	8.81	2.018	9.445	3.863	19.219	9.045	1.325	13.93	6.994	14.316
12	cART+ Arm	2	1		2		850	50	1.69897			0.460899	0.4366	0.205996	-0.676229	0.106816					1413.11	9.87139	4.3	50.7055	7.495	2.2	9.251	7.941	16.765	6.631	3.117	11.656	7.237	11.955	9.517	2.332	9.693	5.07	20.508	8.594	1.32	14.096	7.34	17.834
12	cART+ Arm	2	1		2		339	50	1.69897			1.44619	-0.567575	-0.0521639	-0.999283	-0.0432091					1257.54	4.4	4.3	31.5342	8.201	2.174	11.557	7.01	15.255	9.094	2.994	15.151	7.958	18.451	10.18	2.075	12.477	4.159	17.395	9.527	1.328	14.786	7.092	15.115
12	cART+ Arm	2	1		2		453	50	1.69897			-1.55066	-7.6072	-0.848158	-9.73387	-4.93497					3918.8	51.9051	4.3	32.9686
12	cART+ Arm	2	1		2		984	50	1.69897			1.17628	0.720769	0.174292	0.247431	0.579692					1260.56	37.2162	4.3	34.9376
12	cART+ Arm	2	1		2		1016	20	1.30103			0.271367	-0.328384	0.216604	-0.239132	-0.019886					1035.64	18.4564	4.3	27.2647
12	cART+ Arm	2	1		2		652	50	1.69897												940.385	25.5597	4.3	25.6773
12	cART+ Arm	2	1		2		721	28018	4.44744			1.3093	-0.24234	0.28752	0.370282	0.43119					1536.19	32.7844	4.3	48.6936	8.156	2.492	9.795	7.204	16.971	8.027	3.289	12.732	9.327	12.314	9.523	2.497	9.346	4.501	16.135	9.72	1.638	12.446	8.043	18.571
12	cART+ Arm	2	1		2		532	50	1.69897			0.572174	-4.4849	-1.29989	0.942292	-1.06758					364.377	28.0958	4.3	39.6858	7.543	1.7	10.264	5.723	16.065	7.912	2.573	14.737	9.512	7.369	8.909	2.071	8.52	5.189	18.23	10.649	1.775	14.351	7.532	22.337
12	cART+ Arm	2	1		2		422	50	1.69897			0.561672	-0.778988	0.993167	1.16888	0.486183					1202.63	5.23015	4.3	19.5315
12	cART+ Arm	2	1		2		655	99	1.99564			-0.554895	-0.819736	-0.307606	-2.53919	-1.05536					1257.76	99.498	4.3	59.1944
12	cART+ Arm	2	1		2		788	50	1.69897			0.148453	-0.897189	-0.406568	1.60486	0.11239					1109.46	33.4821	4.3	56.8849
12	cART+ Arm	2	1		2		764	50	1.69897			0.70333	0.075477	-0.442748	-0.0144783	0.0803951					2002.2	65.1621	4.3	83.6257	6.754	1.664	8.871	7.329	13.56	7.737	2.659	12.163	8.394	13.389	9.319	1.863	11.284	6.248	18.599	9.519	1.19	17.736	7.224	18.189
12	cART+ Arm	2	1	24	2	14	575	122	2.08636			1.37081	0.806221	0.850134	1.81243	1.2099					1756.32	78.121	4.3	49.8348
24	Control Arm	0	0		2
24	Control Arm	0	0		1
24	Control Arm	0	0		1
24	Control Arm	0	0		2
24	Control Arm	0	0		2
24	Control Arm	0	0		2
24	Control Arm	0	0		2
24	Control Arm	0	0		1
24	Control Arm	0	0		1
24	Control Arm	0	0		2
24	Control Arm	0	0		2
24	Control Arm	0	0		1
24	Control Arm	0	0		2
24	Control Arm	0	0		1
24	Control Arm	0	0		1
24	Control Arm	0	0		1
24	Control Arm	0	0		2
24	Control Arm	0	0		1
24	Control Arm	0	0		2
24	Control Arm	0	0		2							0.508846	0.750077	0.0276097	-1.37378	-0.0218126
24	Control Arm	0	0		1							1.27197	-0.509573	0.465417	-0.698139	0.132418
24	Control Arm	0	0		1							0.0108319	-0.522121	0.193595	-0.602077	-0.229943
24	Control Arm	0	0		1							-0.679746	0.651847	-1.23461	-0.933756	-0.549067
24	Control Arm	0	0		2							0.606274	0.341751	0.768469	0.982135	0.674657
24	Control Arm	0	0		1							1.19552	1.60343	0.510533	1.28	1.14737
24	Control Arm	0	0		2							0.514884	-0.0186989	-0.586045	-1.55914	-0.41225
24	Control Arm	0	0		2							0.898632	0.170499	1.26921	1.05886	0.849299
24	Control Arm	0	0		2							0.586479	0.503091	-0.586906	1.19148	0.423535
24	Control Arm	0	0		2							1.03252	0.0715354	-0.879565	-1.07929	-0.213701
24	cART Arm	1	1		2		604	50	1.69897			0.124478	-0.0200422	0.918201	0.578068	0.400176					1087.5	206.015	4.3	131.193	6.359	1.835	9.569	5.633	18.017	7.629	2.384	13.684	6.092	8.921	10.049	2.471	11.168	3.959	20.979	8.925	1.315	14.642	4.767	18.409
24	cART Arm	1	1		2		660	50	1.69897	1	0	1.50391	1.11096	1.02874	0.358536	1.00054	623.1	133.406	4.3	223.737	489.9	123.847	4.3	114.921	7.924	2.232	8.848	7.998	12.485	7.323	2.494	9.105	7.169	9.985	9.888	2.399	5.603	6.015	21.668	10.59	1.934	11.183	7.16	24.011
24	cART Arm	1	1		2		486	50	1.69897	1	0	0.38047	0.43872	0.228473	0.333533	0.345299	792.649	88.75	4.3	188.093	3507.09	236.788	10.8994	124.149	7.288	2.127	9.672	5.707	16.819	7.524	2.484	11.294	8.344	13.518	10.545	2.489	11.97	7.26	19.006	9.824	1.681	14.443	7.62	17.817
24	cART Arm	1	1		2		890	50	1.69897			0.00465957	1.26289	-1.7444	0.795047	0.0795471					1634.89	226.031	4.3	80.7108	5.535	1.679	6.813	5.81	13.287	7.924	3.132	11.087	9.211	15.65	10.197	2.647	9.32	6.374	18.918	9.163	1.446	13.076	7.266	18.148
24	cART Arm	1	1		1		600	50	1.69897			0.0443916	1.46034	-1.63334	0.816831	0.172057					1070.44	215.864	4.3	90.9672	6.932	1.679	8.857	5.609	17.475	8.54	2.94	11.839	8.981	17.159	9.563	2.453	8.191	7.586	21.359	9.774	1.476	15.437	8.349	19.871
24	cART Arm	1	1		2		936	50	1.69897			1.19084	0.543332	0.940031	1.88211	1.13908					1032.24	159.325	4.3	64.3356	6.953	1.788	9.524	6.838	17.849	7.345	2.811	11.805	9.147	16.96	10.955	2.424	9.689	4.744	19.371	9.946	1.579	15.095	7.741	17.894
24	cART Arm	1	1		2		455	50	1.69897			0.762158	0.737467	0.0986717	1.01851	0.654202					910.8	92.8674	4.3	56.0605	6.963	2.203	8.505	4.691	19.033	8.765	3.149	12.986	7.187	13.594	9.321	2.031	11.272	3.832	19.109	9.14	1.801	14.539	6.783	16.412
24	cART Arm	1	1		2		363	50	1.69897	1	0	0.59856	-1.01272	-0.240123	-0.677746	-0.333007	585.695	40.326	4.3	358.597	1869.42	181.147	4.3	97.0278	6.871	1.682	8.143	5.956	16.824	7.711	2.438	12.711	6.121	12.733	9.176	1.965	9.81	2.737	14.203	9.742	1.284	15.594	6.617	16.36
24	cART Arm	1	1		1		979	50	1.69897	1	0	-0.908722	-2.48651	-1.23941	-3.19269	-1.95683	541.167	39.714	4.3	556.077	1579.23	213.632	4.3	94.9882	6.925	2.053	9.903	6.758	18.703	7.024	2.666	13.318	6.434	12.13	8.875	1.769	11.891	5.182	12.23	10.881	1.68	17.803	6.787	17.416
24	cART Arm	1	1		2		579	64	1.80618	1	0	2.5109	1.32895	0.354701	1.60855	1.45078	647.174	124.596	4.7	2000					6.917	2.168	9.507	6.089	15.537	7.365	2.689	12.22	7.613	14.322	8.865	1.972	10.829	4.991	17.216	9.881	1.786	14.682	6.7	14.121
24	cART Arm	1	1		2		636	50	1.69897			0.950258	0.351837	0.181585	0.405575	0.472314					1611.86	171.784	4.3	135.117	6.968	1.628	6.66	5.113	16.75	8.008	2.735	12.595	7.136	12.531	9.171	1.819	9.22	5.083	21.224	9.905	1.565	14.009	3.251	22.505
24	cART Arm	1	1		2		513	50	1.69897			0.553862	0.168892	0.148912	0.921149	0.448204					937.618	196.821	4.3	371.777
24	cART Arm	1	1		2		555	50	1.69897			-0.0471661	0.446001	-0.562254	-1.6639	-0.45683					1300.11	10.4251	4.3	91.0916	8.542	2.537	5.823	7.956	17.252	8.679	3.663	9.527	8.766	15.095	8.566	2.247	7.631	6.159	18.278	9.06	1.93	13.638	8.215	21.617
24	cART Arm	1	1		2		644	50	1.69897			0.146133	0.985227	-2.00308	-0.562478	-0.358551					799.992	22.8729	4.3	73.8526	7.951	2.12	8.526	8.207	14.046	7.631	2.578	12.178	7.767	13.05	10.895	2.385	10.126	5.197	18.648	9.3	1.317	14.828	6.103	15.71
24	cART Arm	1	1		2		830	50	1.69897			0.727078	1.58557	1.18396	-0.357666	0.784737					1128.74	21.695	4.3	39.1919	6.987	1.903	6.859	7.088	16.429	9.848	3.123	11.204	10.264	16.834	10.039	2.666	8.521	5.567	23.886	11.284	2.07	14.223	8.364	20.559
24	cART Arm	1	1		2		507	102	2.0086			-2.22582	-0.0594646	-1.78795	0.376349	-0.924223					896.36	13.4861	4.3	25.7962	7.215	2.005	8.779	6.111	14.879	8.424	2.907	12.392	7.749	14.736	10.151	1.898	10.068	4.819	15.267	10.602	1.809	14.286	9.25	19.938
24	cART Arm	1	1		2		503	50	1.69897			1.7396	-0.24468	-1.439	1.38863	0.361136					1488.24	17.5905	4.3	30.5804
24	cART Arm	1	1		2		486	50	1.69897			-1.24485	-1.1054	-0.546934	-2.56907	-1.36656					999.881	4.63955	4.3	48.1523	6.743	1.977	8.156	7.145	17.708	9.158	3.406	11.604	13.554	12.844	7.784	1.639	8.122	5.798	12.783	9.569	1.62	13.916	7.996	18.123
24	cART Arm	1	1		2		470	50	1.69897	1	0	2.16825	0.778858	0.965632	1.07194	1.24617	177.1	97.6667	4.3	383.8	1283.87	4.4	4.3	56.9765	6.618	1.675	7.088	4.993	16.658	6.219	2.136	11.517	5.573	12.129	9.56	2.058	11.479	6.056	20.022	8.795	1.387	15.171	7.63	20.331
24	cART Arm	1	1		2		449	50	1.69897												1492.03	66.4706	4.3	39.1503
24	cART Arm	1	1		2		462	50	1.69897			0.52346	-0.225702	0.405599	0.135044	0.2096					1005.67	9.13431	4.3	29.9923	7.21	1.924	10.098	6.378	15.887	7.108	2.697	11.831	8.256	12.665	9.22	2.121	9.282	4.882	18.251	9.752	1.605	14.136	8.153	20.901
24	cART Arm	1	1		2		568	50	1.69897	1	0	1.02663	0.239772	0.632437	-1.31395	0.146222	177.1	373.033	4.3	288.867	1018.01	8.88744	4.3	24.7723	7.062	2.303	9.195	6.511	15.553	9.046	2.888	13.139	7.924	15.774	9.023	2.054	10.256	6.21	14.844	9.672	1.265	15.785	6.998	12.041
24	cART Arm	1	1		2		538	74	1.86923			0.923667	0.919334	0.297436	0.79391	0.733587	1905.7	2050.67	4.3	620.967	1934.68	114.624	4.3	60.1317	7.399	2.228	9.818	7.535	18.36	8.302	3.251	13.038	11.476	12.354	8.832	1.943	8.875	6.7	15.087	9.884	1.498	16.231	8.049	11.415
24	cART Arm	1	1		2		980	50	1.69897			0.944834	0.125579	0.0230738	0.275359	0.342211					928.862	24.0419	4.3	34.6411	9.224	2.173	10.215	8.314	15.976	8.745	3.301	11.939	8.391	16.646	9.243	1.878	7.778	4	19.884	8.12	1.159	14.042	5.842	12.438
24	cART Arm	1	1		2		990	50	1.69897			0.154454	-2.56697	-8.61928	-0.578661	-2.90261					937.232	9.20679	4.3	25.6712	7.629	2.35	10.246	8.103	11.961						7.831	1.651	8.469	5.654	17.546
24	cART Arm	1	1		2		766	50	1.69897			1.4566	-0.846014	0.284338	-1.83544	-0.235129					387.256	8.21263	4.3	60.641
24	cART Arm	1	1		2		1056	50	1.69897	1	0	1.43928	1.29291	1.26137	0.557723	1.13782	177.1	51.8667	4.3	264.767	701.394	8.60165	4.3	39.5968
24	cART Arm	1	1		2		794	50	1.69897			0.293619	0.738106	-1.16256	0.963849	0.208253					1698.85	59.9454	4.3	58.1004
24	cART Arm	1	1	21	2	17	874	72	1.85733			1.17915	0.943098	0.399376	0.583712	0.776334					1607.91	29.4036	4.3	49.4704	7.417	2.868	13.277	5.905	10.248						7.887	1.743	8.445	3.609	17.055
24	cART Arm	1	1	23	2	16	765	50	1.69897			1.30955	0.381619	-0.0596598	1.33365	0.74129					7279.89	289.148	4.3	58.773	7.232	2.302	9.871	5.986	18.343	8.016	2.93	12.24	6.53	14.861	9.362	2.403	10.319	4.686	16.844	9.308	1.734	16.181	7.824	13.334
24	cART+ Arm	2	1		2		591	50	1.69897	1	0	0.8587	0.642212	0.268702	0.165859	0.483868	996.061	58.697	4.3	364.377	2366.5	438.789	4.3	80.117	6.661	2.058	9.194	6.88	13.433	7.318	3.16	13.057	7.486	15.523	10.791	2.982	13.551	5.049	24.446	8.899	1.788	15.147	8.176	15.458
24	cART+ Arm	2	1		2		674	50	1.69897	1	0	-0.854494	1.26087	0.271092	0.781745	0.364803	1008.96	63.863	4.3	272.873	794.9	159.899	4.3	63.393	7.045	2.062	9.487	6.963	17.749	9.494	2.792	10.912	6.706	12.477	9.988	2.383	11.01	6.363	18.499	9.768	1.847	13.505	7.958	17.23
24	cART+ Arm	2	1		2		597	50	1.69897			2.18981	1.03234	0.334655	1.36186	1.22967					1964	103.268	4.3	148.708	7.218	2.425	10.078	7.443	19.757	7.745	2.769	12.608	6.373	11.517	11.066	2.571	10.14	4.652	18.667	10.725	1.71	12.642	6.394	20.403
24	cART+ Arm	2	1		2		520	169	2.22789			1.4405	0.455842	0.556795	-1.52103	0.233026					1894.7	183.883	4.3	88.14
24	cART+ Arm	2	1		2		488	50	1.69897	1	0	0.764368	0.834481	0.745607	1.38643	0.932722	734.206	71.775	4.3	276.7	709.6	105.614	4.3	131.532	7.266	1.974	10.582	5.697	17.488	8.126	2.885	13.535	5.322	16.19	10.638	2.612	12	5.815	17.946	8.871	1.448	13.589	6.737	20.625
24	cART+ Arm	2	1		2		552	50	1.69897	1	0	1.27527	-1.01381	0.943111	0.0578456	0.315603	563.431	77.068	4.3	237.877	760.414	308.449	4.3	122.458
24	cART+ Arm	2	1		2		864	50	1.69897	1	0	0.140111	-3.35997	-0.000465365	0.823428	-0.599223	703.593	123.022	4.3	327.207	1881.64	186.82	4.80989	57.457	6.246	1.998	6.845	4.921	16.948	7.695	3.105	12.788	7.336	13.051	11.218	3.153	8.884	8.201	20.946	8.439	1.385	13.975	6.407	20.696
24	cART+ Arm	2	1		2		908	50	1.69897	1	0	1.2219	0.130529	0.333944	0.987573	0.668488	561.407	168.375	4.3	271.137	1457.28	166.989	4.3	72.1307	6.531	1.851	10.124	6.575	18.306	8.14	2.895	13.85	9.179	17.974	10.266	2.437	13.305	7.38	20.497	10.02	1.62	15.095	8.02	16.56
24	cART+ Arm	2	1		2		772	50	1.69897			-0.382614	0.0883488	-1.01111	0.898985	-0.101597					913.077	147.422	4.3	59.4987
24	cART+ Arm	2	1		2		825	50	1.69897			1.15834	0.72674	0.124625	0.205445	0.553788					1607.82	146.926	4.3	76.2237	6.804	1.844	8.846	5.584	15.267	8.986	2.69	12.043	9.844	16.545	10.031	2.165	11.761	5.155	21.529	9.496	1.449	14.178	6.789	18.6
24	cART+ Arm	2	1		1		338	50	1.69897	1	0	0.302958	-0.296894	-0.319483	0.170328	-0.0357727	715.484	71.119	4.3	484.18	1445.14	242.218	4.3	156.828	7.147	1.763	9.07	5.189	13.952	9.127	2.879	11.642	8.797	14.429	10.312	2.277	10.519	6.562	17.753	10.514	1.711	14.439	7.07	16.374
24	cART+ Arm	2	1		2		463	50	1.69897	1	0	-0.710266	-1.3291	-0.834771	-0.716033	-0.897541	1290.55	211.279	4.3	750.983	1259.18	219.896	4.3	68.4165
24	cART+ Arm	2	1		2		600	50	1.69897	1	0	1.55601	1.68169	1.04275	0.967856	1.31208	1570.88	154.248	4.3	1896.67	1922.29	182.945	4.3	163.319	6.812	1.647	9.444	6.866	10.082	7.754	2.605	11.708	7.133	13.475	10.99	2.18	11.514	5.126	17.423	9.009	1.328	13.431	7.007	18.693
24	cART+ Arm	2	1		2		745	50	1.69897	1	0	0.971626	-0.186671	0.284642	-0.126533	0.235766	1735.58	435.966	4.3	1041.73	1175.94	122.197	5.70731	100.958	6.626	2.104	8.048	6.557	14.564	8.104	2.874	9.604	9.876	13.342	8.22	2.066	8.331	4.35	13.379	11.325	1.897	16.308	9.683	17.744
24	cART+ Arm	2	1		2		904	50	1.69897			0.773118	-0.927662	1.01189	-0.850631	0.00167975					360.504	23.4953	4.3	82.1032
24	cART+ Arm	2	1		2		458	50	1.69897												187.323	4.4	4.3	41.7894	7.08	1.747	9.385	6.277	17.3	8.417	2.701	12.366	6.856	12.101	12.169	2.4	14.047	5.319	22.645	9.724	1.415	15.323	7.633	18.644
24	cART+ Arm	2	1		1		1051	50	1.69897			1.72017	0.402203	-0.0172185	-1.10969	0.248866					177.1	22.6918	4.3	32.6471	6.759	1.862	8.489	6.054	17.111	8.217	2.533	12.317	8.315	11.911	9.378	2.221	9.725	5.784	19.714	10.074	1.403	14.765	7.383	15.544
24	cART+ Arm	2	1		2		571	50	1.69897			1.59255	1.00047	1.98869	0.632095	1.30345					1829.17	12.7238	4.3	13.8167
24	cART+ Arm	2	1		2		540	50	1.69897	100	2						217.92	171.767	4.3	303.267	1597.08	17.2749	4.3	52.99	7.022	1.652	8.071	5.636	14.856	7.54	2.628	11.733	6.204	15.519	6.842	1.337	7.524	2.978	13.311	9.67	1.271	13.602	6.41	18.731
24	cART+ Arm	2	1		2		855	50	1.69897			1.12755	-0.217154	-0.753046	-0.14084	0.00412817					2209.86	13.3264	4.3	48.1971
24	cART+ Arm	2	1		2		312	50	1.69897			1.15385	0.400463	0.080313	0.0578456	0.423117					776.919	4.4	4.3	37.2677	8.395	2.046	11.355	7.532	13.134	8.462	2.927	14.291	6.335	14.676	8.476	1.744	9.647	4.462	18.324	9.521	1.323	15.88	6.287	17.691
24	cART+ Arm	2	1		2		671	50	1.69897												1724.12	4.4	4.3	25.1386	7.698	1.907	8.576	6.298	20.033	9.907	3.616	13.585	8.45	17.072	9.129	1.965	10.778	5.57	19.965	9.982	1.644	14.623	8.062	17.937
24	cART+ Arm	2	1		2		730	50	1.69897	1	0	1.15462	1.68388	-0.753046	0.570485	0.663984	0	342.133	4.3	288	1150.52	31.7232	4.3	26.5581
24	cART+ Arm	2	1		2		1084	50	1.69897			0.227525	0.827539	0.384432	0.493628	0.483281					524.647	14.5708	4.3	56.3501
24	cART+ Arm	2	1		2		663	50	1.69897			1.20025	1.30937	0.0576673	1.27119	0.959619					978.894	38.4913	4.3	33.6607
24	cART+ Arm	2	1		2		789	5596	3.74788			1.03861	0.339139	0.920466	1.00577	0.825998					1084.43	19.2457	4.3	34.4076	6.776	1.965	8.702	6.438	15.917	6.959	3.069	10.84	8.321	11.772	10.372	2.609	8.195	5.319	20.246	8.555	1.412	12.156	6.691	14.494
24	cART+ Arm	2	1		2		556	50	1.69897			-0.428892	-0.751121	-2.42176	0.375832	-0.806486					559.445	10.979	4.3	39.7748
24	cART+ Arm	2	1		2		301	50	1.69897			2.29938	0.312344	0.318431	1.25757	1.04693					1278.79	9.20679	4.3	25.0038	6.685	1.638	8.531	4.41	15.077	9.196	2.593	12.812	8.505	19.71	8.295	1.703	9.531	4.014	15.11	10.329	1.365	15.307	7.217	18.093
24	cART+ Arm	2	1		2		439	50	1.69897			0.0416171	0.945287	-0.620331	0.27582	0.160598					3533.36	66.1107	4.3	74.388
24	cART+ Arm	2	1		2		853	50	1.69897			1.19252	0.427839	0.261478	0.922355	0.701047					1170.56	45.5281	4.3	69.0398
24	cART+ Arm	2	1		2		1229	50	1.69897			1.53983	0.573012	-0.341112	-0.0100798	0.440413					781.996	23.1435	4.3	46.0063
24	cART+ Arm	2	1	24	2	14	523	102	2.0086			1.96268	1.13308	0.503866	1.54705	1.28667					2931.59	91.5672	4.3	62.2453	6.876	1.844	9.159	6.53	15.056	8.583	2.988	13.97	8.813	14.057	10.981	2.433	10.89	6.06	22.612	8.811	1.279	13.067	6.682	17.44
